# Supplementary material for: Effects of COVID-19 vaccination and previous infection on Omicron SARS-CoV-2 infection and relation with serology
Source: PubMed Central journal article supplement (PMC10412579; doi:10.1038/s41467-023-40195-z), 2023-08-09
Supplement: 41467_2023_40195_MOESM1_ESM.pdf [file 41467_2023_40195_MOESM1_ESM.pdf]

## Supplementary material

To manuscript

### Effects of COVID-19 vaccination and previous infection on Omicron SARS-CoV-2 infection and relation with serology

Brechje de Gier, Anne J. Huiberts, Christina E. Hoeve, Gerco den Hartog, Henri van Werkhoven, Rob van Binnendijk, Susan J.M. Hahné, Hester E. de Melker, Susan van den Hof, Mirjam J. Knol

*Table S1. Vaccines received by study participants, per dose. Participants who did not receive the dose were excluded from the percentage calculation.*

|               |                              | N (%)        |
|---------------|------------------------------|--------------|
| <b>Dose 1</b> | AstraZeneca (Vaxzevria)      | 14585 (34.5) |
|               | BioNTech/ Pfizer (Comirnaty) | 17036 (40.3) |
|               | Janssen                      | 4729 (11.2)  |
|               | Moderna (Spikevax)           | 5864 (13.9)  |
|               | Unknown                      | 31 ( 0.1)    |
| <b>Dose 2</b> | AstraZeneca (Vaxzevria)      | 13505 (32.3) |
|               | BioNTech/ Pfizer (Comirnaty) | 19191 (45.9) |
|               | Janssen                      | 115 ( 0.3)   |
|               | Moderna (Spikevax)           | 7971 (19.0)  |
|               | Novavax                      | 2 ( 0.0)     |
|               | Unknown                      | 1072 ( 2.6)  |
| <b>Dose 3</b> | AstraZeneca (Vaxzevria)      | 343 ( 1.0)   |
|               | BioNTech/ Pfizer (Comirnaty) | 13822 (38.5) |
|               | Janssen                      | 18 ( 0.1)    |
|               | Moderna (Spikevax)           | 21408 (59.7) |
|               | Novavax                      | 2 ( 0.0)     |
|               | Unknown                      | 264 ( 0.7)   |
| <b>Dose 4</b> | AstraZeneca (Vaxzevria)      | 99 ( 0.8)    |
|               | BioNTech/ Pfizer (Comirnaty) | 3239 (27.3)  |
|               | Janssen                      | 4 ( 0.0)     |
|               | Moderna (Spikevax)           | 8159 (68.7)  |
|               | Novavax                      | 5 ( 0.0)     |
|               | Unknown                      | 374 ( 3.1)   |

*Table S2. Association between anti-S-antibody concentration in quartiles and risk of infection, crude and adjusted for age, sex, educational level and medical risk group, n = 20,402 participants.*

| Quartile log-anti-S-antibody concentration | Person-days | Infections | HR (95% CI) crude | HR (95% CI) adjusted |
|--------------------------------------------|-------------|------------|-------------------|----------------------|
| <b>(3,8.82]</b>                            | 101221      | 318        | [ref]             | [ref]                |
| <b>(8.82,9.43]</b>                         | 102668      | 251        | 0.75 (0.64-0.89)  | 0.83 (0.70-0.98)     |
| <b>(9.43,10.4]</b>                         | 101896      | 203        | 0.59 (0.49-0.70)  | 0.65 (0.55-0.79)     |
| <b>(10.4,12.3]</b>                         | 102326      | 78         | 0.24 (0.19-0.31)  | 0.29 (0.23-0.37)     |

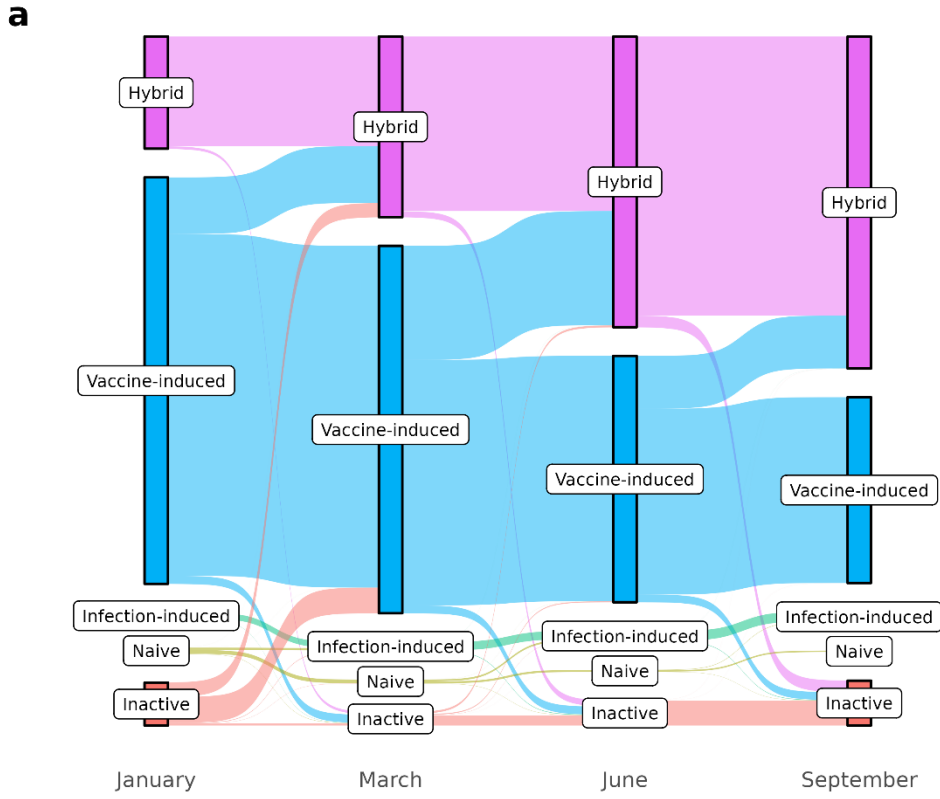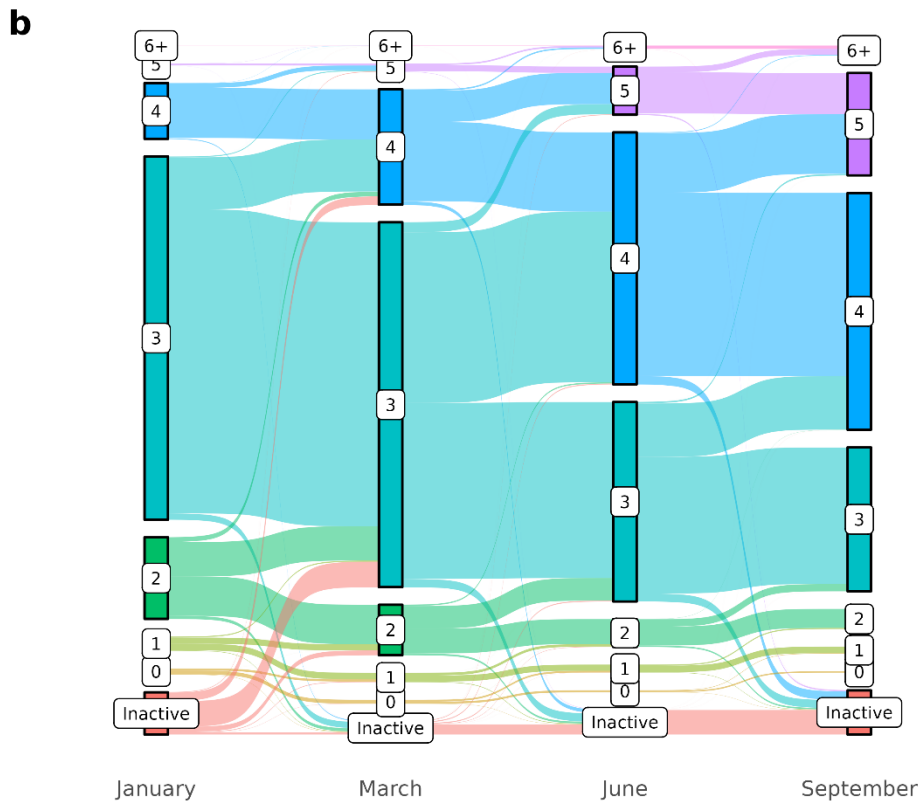

Figure S1. Sankey diagrams showing the changes in the VASCO study population during the study period (January-September 2022), in terms of type of immunity (A) and number of prior immunizing events (B).

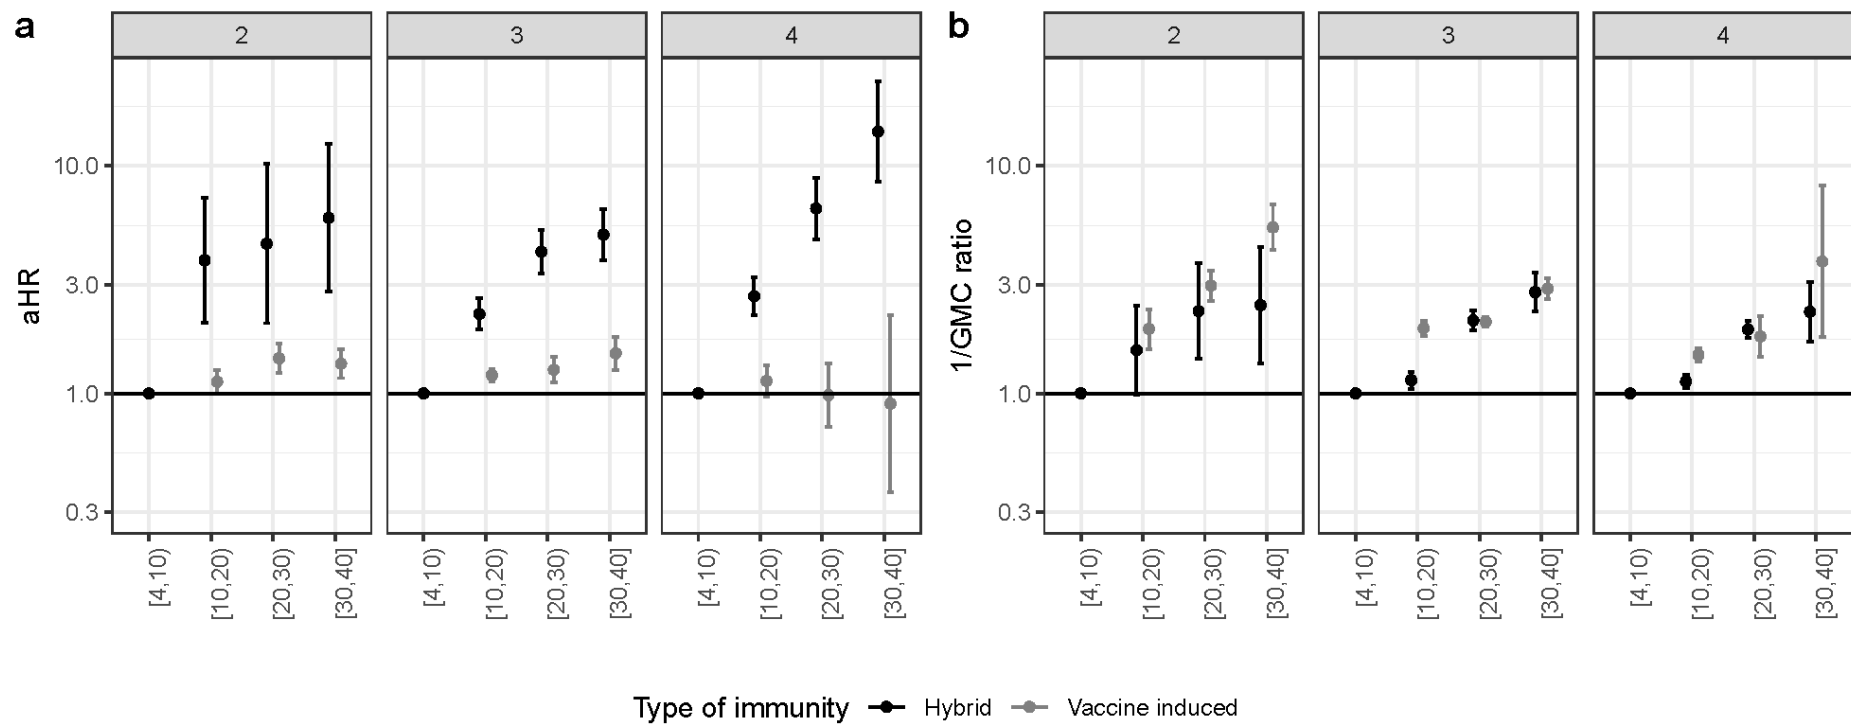

Figure S2. A. Adjusted hazard ratio (aHR) of infection with Omicron SARS-CoV-2 by type of immunizing events, stratified by the number of immunizing events,  $n = 39,810$  participants. B. One divided by the adjusted geometric mean concentration (GMC) ratio of S-antibodies,  $n = 20,402$  participants. In both analyses, 4 to 10 weeks after the last immunizing event was the reference group. The group with 4 immunizing events only includes participants aged 60 and older, because younger people were not eligible for 4 vaccinations. Data are presented as aHR with 95% confidence intervals, adjusted for age, sex, educational level and medical risk group. Numbers between brackets on the x axis represent weeks since the last immunizing event.

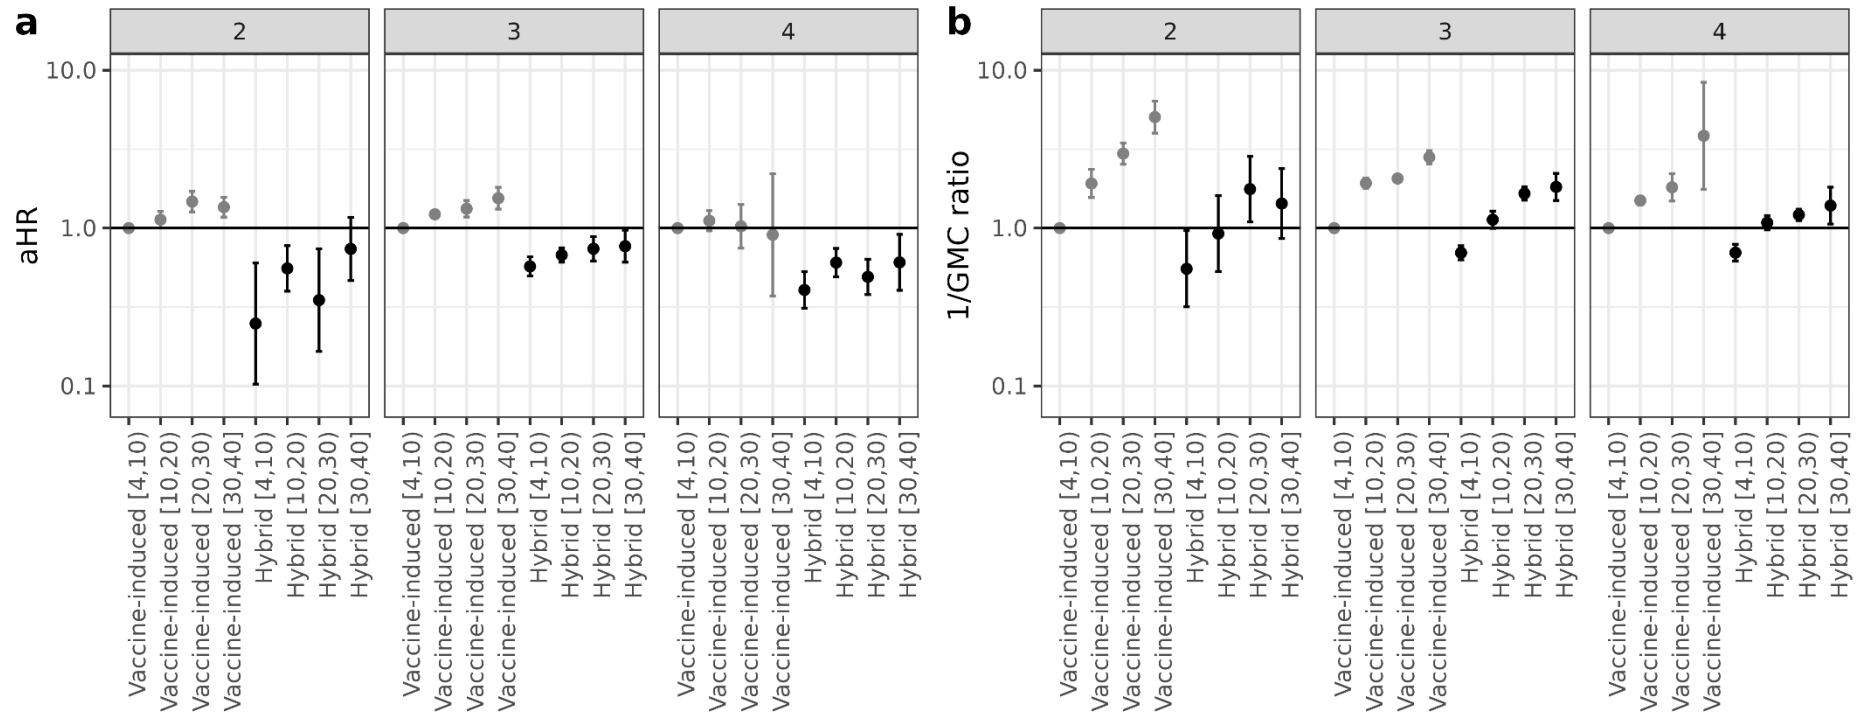

Figure S3: A. Adjusted hazard ratio (HR) of infection with Omicron SARS-CoV-2 by type of immunizing event, stratified by the number of immunizing events, excluding participants with a previous Omicron infection,  $n = 38,155$  participants. B. One divided by the adjusted geometric mean concentration (GMC) ratio of S-antibodies, excluding participants with a previous Omicron infection,  $n = 15,811$  participants. In both analyses, 4 to 10 weeks after the last vaccination for vaccine-only immunity was the reference group. The group with 4 immunizing events only includes participants aged 60 and older, because younger people were not eligible for 4 vaccinations. Data are presented as aHR with 95% confidence intervals, adjusted for age, sex, educational level and medical risk group. Numbers between brackets on the x axis represent weeks since the last immunizing event.
